# Supplementary material for: Chitosan-based nanoparticles for targeted delivery of 17β-estradiol to enhance SIRT1-mediated autophagy and mitigate rotenone-induced Parkinson's disease
Source: Royal Society of Chemistry journal article supplement (doi:10.1039/d5tb02351c), 2026-01-01
Supplement: d5tb02351c1.pdf [file d5tb02351c1.pdf]

## Supporting information

### Chitosan-Based Nanoparticles for Targeted Delivery of 17 $\beta$ -Estradiol to Enhance SIRT1-Mediated Autophagy and Mitigate Rotenone-Induced Parkinson's Disease

*Liku Biswal<sup>a</sup>, Mohd Ayoub<sup>a</sup>, Devangi Ghosh<sup>a</sup>, Vikas Kumar Sahu<sup>a</sup>, Subhasree Roy Choudhury<sup>a\*</sup>, Surajit Karmakar<sup>a\*</sup>*

<sup>a</sup> Institute of Nano Science and Technology, Knowledge City, Sector 81, Mohali, 140306, Punjab, India

\*Corresponding author:

Surajit Karmakar, Email ID: [surajit@inst.ac.in](mailto:surajit@inst.ac.in), Tel: +91-172 2210075

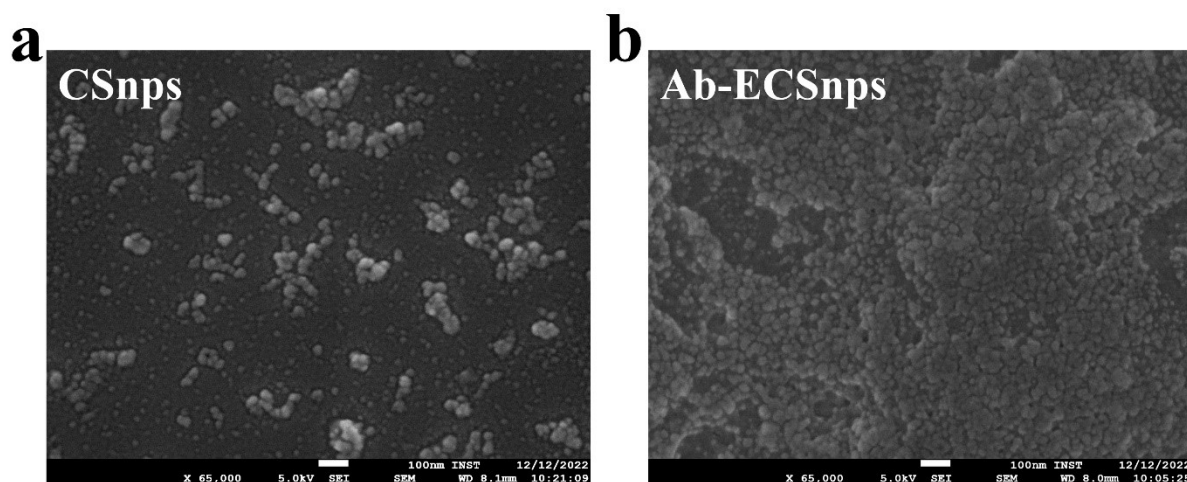

**Figure S1.** FESEM images of CSnps and Ab-ECSnps showing spherical morphology.

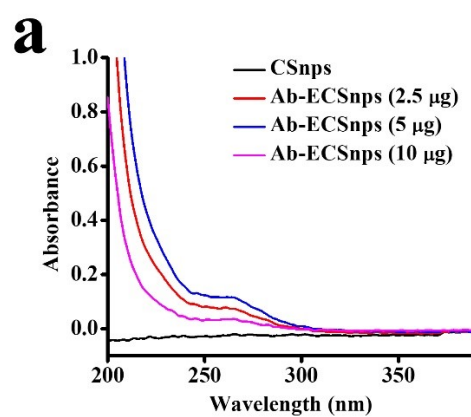

**Figure S2.** The absorbance of CSnps and Ab-CSnps (conjugated with 2.5, 5, and 10 µg D3 antibody) was recorded in a UV-visible spectrophotometer.

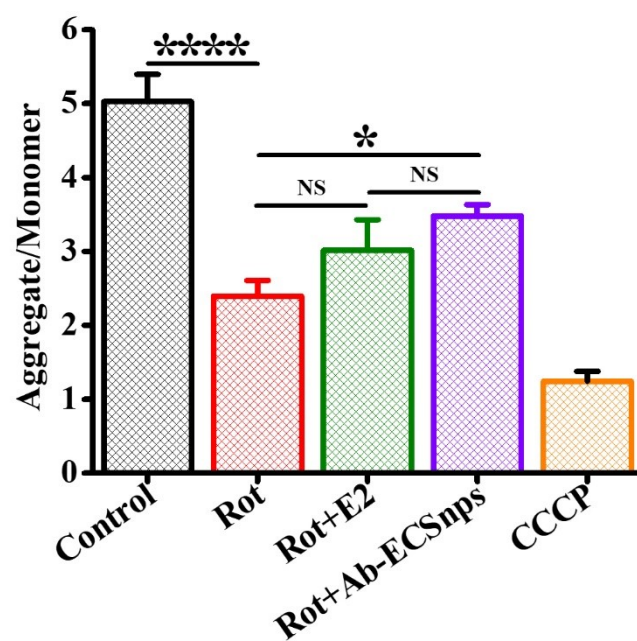

**Figure S3.** Quantitative plot of aggregate/monomer ratio from flow cytometric analysis of JC-1 assay.

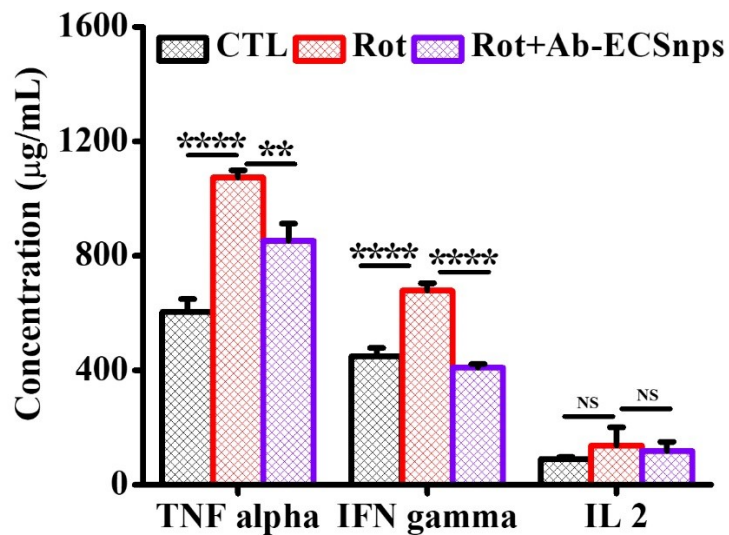

**Figure S4.** Concentration of TNF alpha, IFN gamma, and IL-2 in the striatum of the brain was analysed through ELISA.

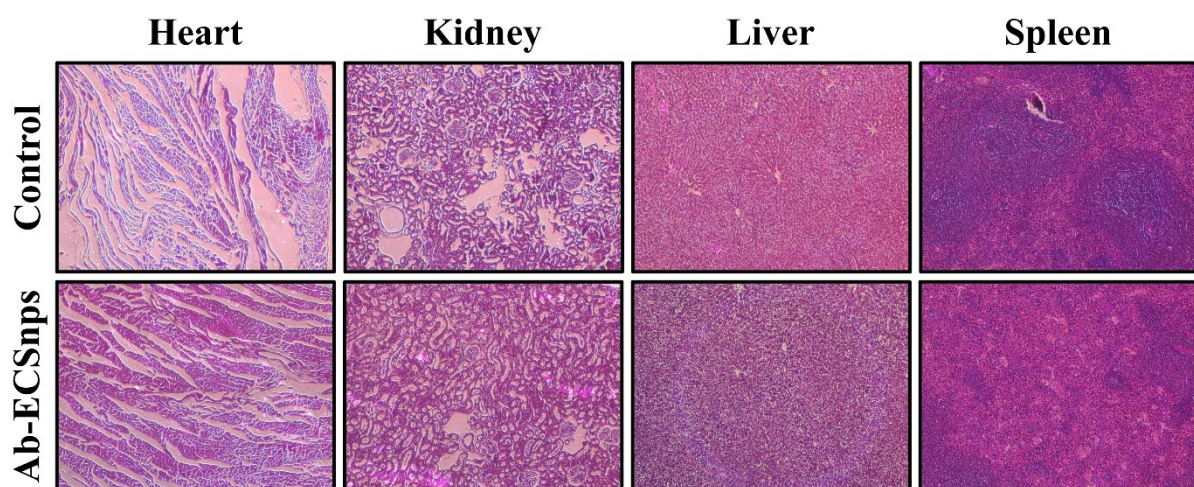

**Figure S5.** H&E staining of vital organs (heart, kidney, lungs, liver) after 30 days of Ab-ECSnps treatment.

**Table S1.** List of primers

| Serial Number | Name of the gene | Sequences of primers         |
|---------------|------------------|------------------------------|
| 1.            | Beclin1          | Forward: GGTTGCGGTTTTCTGGGAC |

|    |       |                                 |
|----|-------|---------------------------------|
|    |       | Reverse: TTGATGGAATAGGAGCCGCC   |
| 2. | Vps34 | Forward: GCATCACGACGTATTGAAATGA |
|    |       | Reverse: CCGAAACAATCCCAACACCA   |
