# Supplementary material for: Chitosan-based nanoparticles for targeted delivery of 17β-estradiol to enhance SIRT1-mediated autophagy and mitigate rotenone-induced Parkinson's disease
Source: Royal Society of Chemistry journal article supplement (doi:10.1039/d5tb02351c), 2026-01-01
Supplement: d5tb02351c2.pdf [file d5tb02351c2.pdf]

## Supporting information

### Chitosan-Based Nanoparticles for Targeted Delivery of 17 $\beta$ -Estradiol to Enhance SIRT1-Mediated Autophagy and Mitigate Rotenone-Induced Parkinson's Disease

Liku Biswal<sup>a</sup>, Mohd Ayoub<sup>a</sup>, Devangi Ghosh<sup>a</sup>, Vikas Kumar Sahu<sup>a</sup>, Subhasree Roy Choudhury<sup>a\*</sup>, Surajit Karmakar<sup>a\*</sup>

<sup>a</sup> Institute of Nano Science and Technology, Knowledge City, Sector 81, Mohali, 140306, Punjab, India

\*Corresponding author:

Surajit Karmakar, Email ID: [surajit@inst.ac.in](mailto:surajit@inst.ac.in), Tel: +91-172 2297000

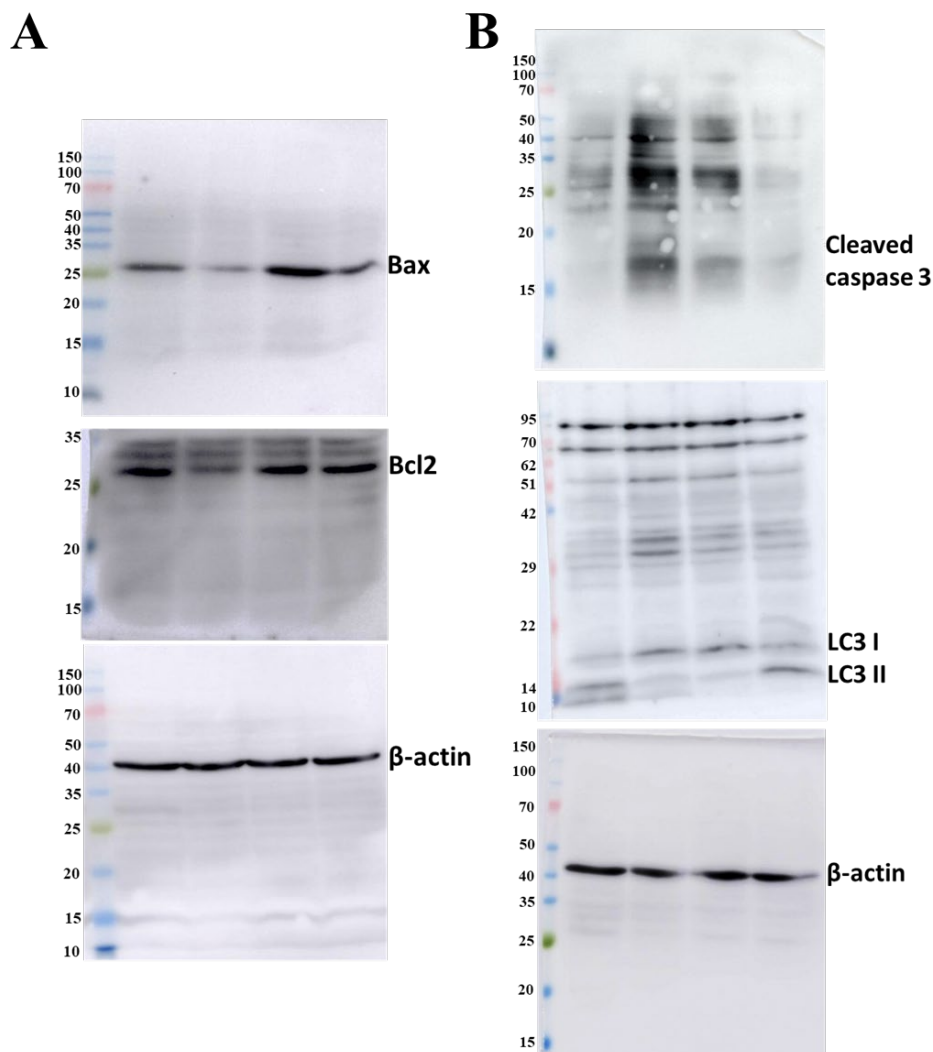

Fig. 1 Uncropped and unedited immunoblots corresponding to “figure 3”.

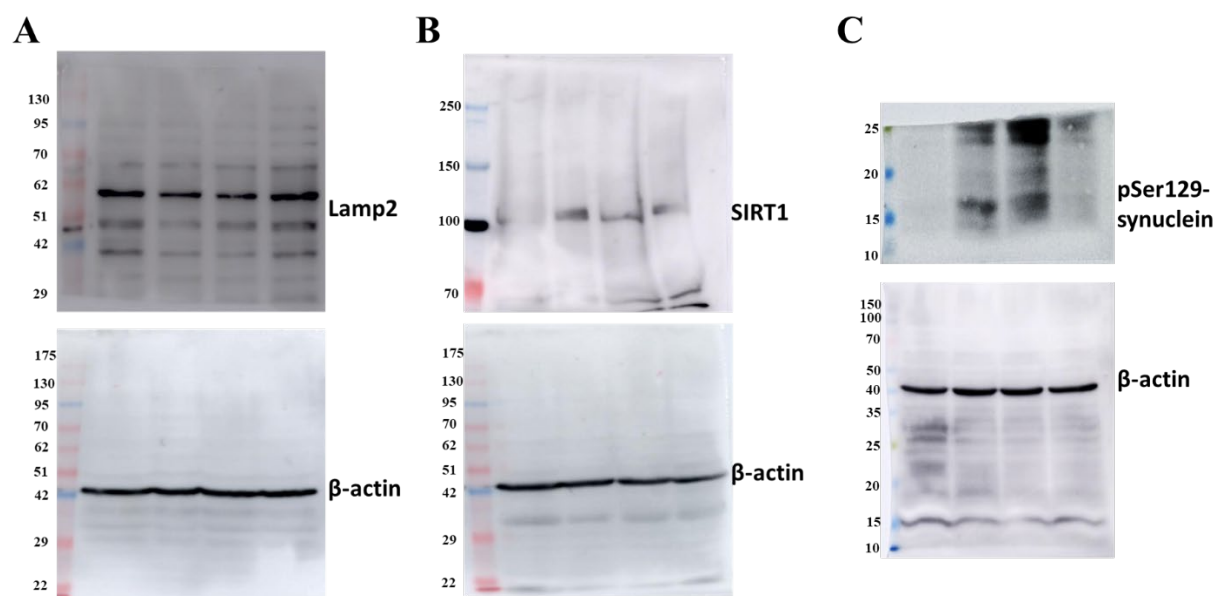

Fig. 2 Uncropped and unedited immunoblots corresponding to “figure 4”.

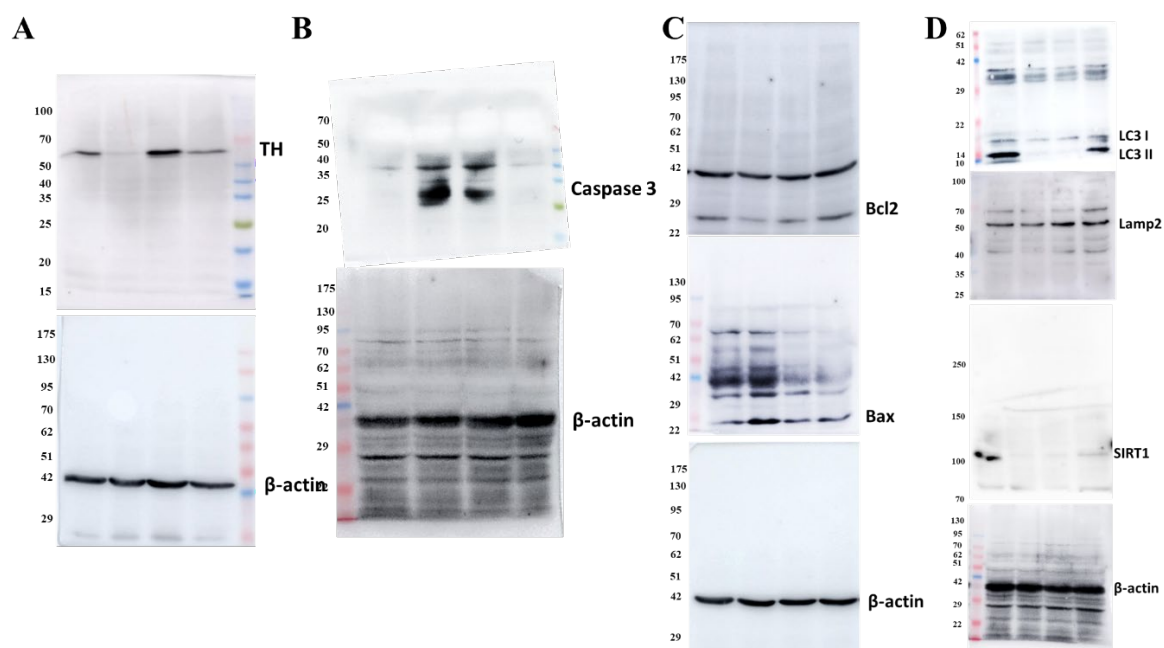

Fig. 3 Uncropped and unedited immunoblots corresponding to “figure 5”.
